# Supplementary material
Source: PubMed Central journal article supplement (PMC10397222)
Supplement: 41422_2023_808_MOESM2_ESM.pdf [file 41422_2023_808_MOESM2_ESM.pdf]

Supplementary information, Fig. S2

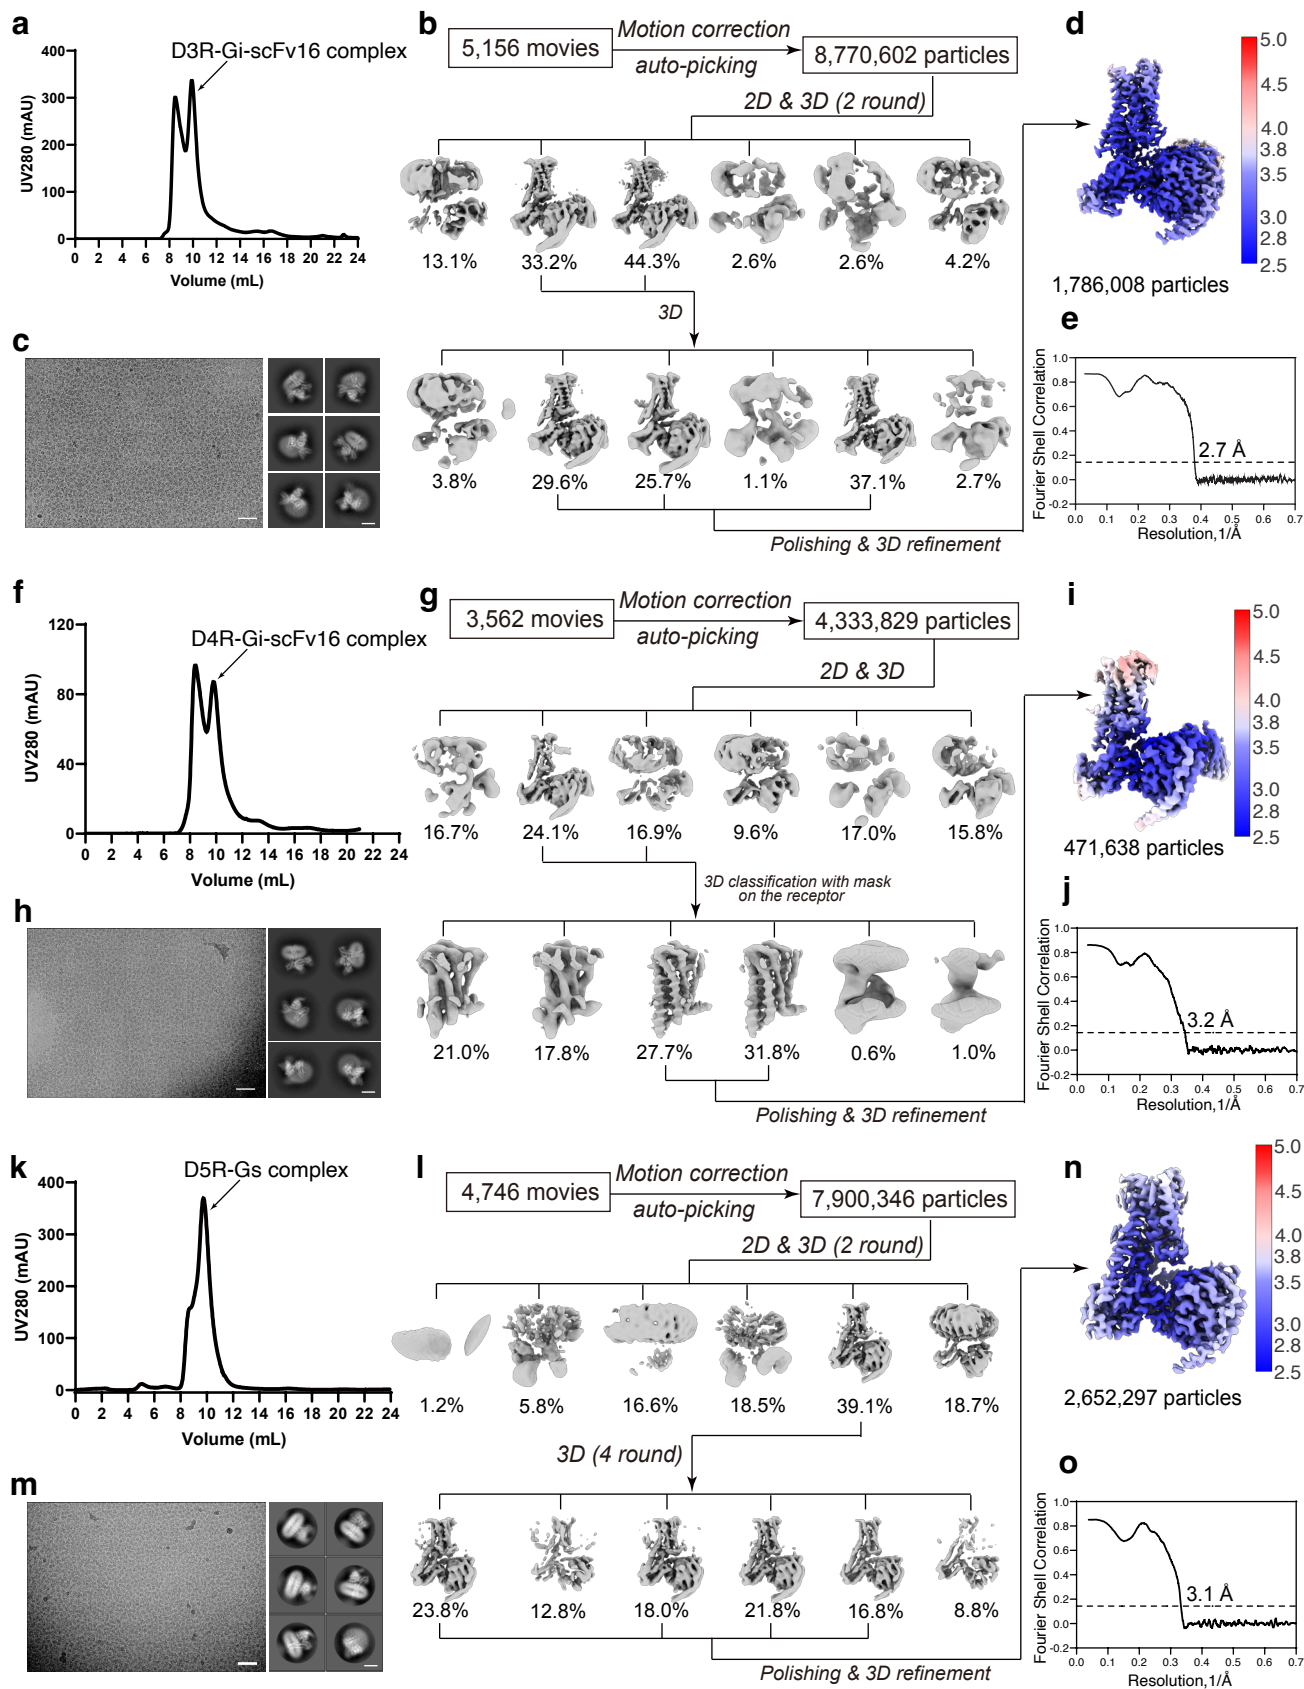

**Fig. S2. D3R-G<sub>i</sub>, D4R-G<sub>i</sub>, and D5R-G<sub>s</sub> complexes preparation and cryo-EM data processing.** **a-e** D3R-G<sub>i</sub> complexes preparation and cryo-EM data processing. a, Profiles of size-exclusion chromatography elution of the D3R-G<sub>i</sub> complex. b, Workflow of cryo-EM single-particle analysis of the D3R-G<sub>i</sub> complex. c, Representative cryo-EM images (scale bar, 50 nm) and 2D classification (scale bar, 5 nm) of the D3R-G<sub>i</sub> complex. d, Local resolution distribution of D3R-G<sub>i</sub> complex. e, Fourier shell correlation curves of the D3R-G<sub>i</sub> complex. **f-j** D4R-G<sub>i</sub> complexes preparation and cryo-EM data processing. f, Profiles of size-exclusion chromatography elution of the D4R-G<sub>i</sub> complex. g, Workflow of cryo-EM single-particle analysis of the D4R-G<sub>i</sub> complex. h, Representative cryo-EM images (scale bar, 50 nm) and 2D classification (scale bar, 5 nm) of the D4R-G<sub>i</sub> complex. i, Local resolution distribution of D4R-G<sub>i</sub> complex. j. Fourier shell correlation curves of the D4R-G<sub>i</sub> complex. **k-o** D5R-G<sub>s</sub> complexes preparation and cryo-EM data processing. k, Profiles of size-exclusion chromatography elution of the D5R-G<sub>s</sub> complex. l, Workflow of cryo-EM single-particle analysis of the D5R-G<sub>s</sub> complex. m, Representative cryo-EM images (scale bar, 50 nm) and 2D classification (scale bar, 5 nm) of the D5R-G<sub>s</sub> complex. n, Local resolution distribution of D5R-G<sub>s</sub> complex. o, Fourier shell correlation curves of the D5R-G<sub>s</sub> complex.
