# Supplementary material
Source: PubMed Central journal article supplement (PMC10397222)
Supplement: 41422_2023_808_MOESM3_ESM.pdf [file 41422_2023_808_MOESM3_ESM.pdf]

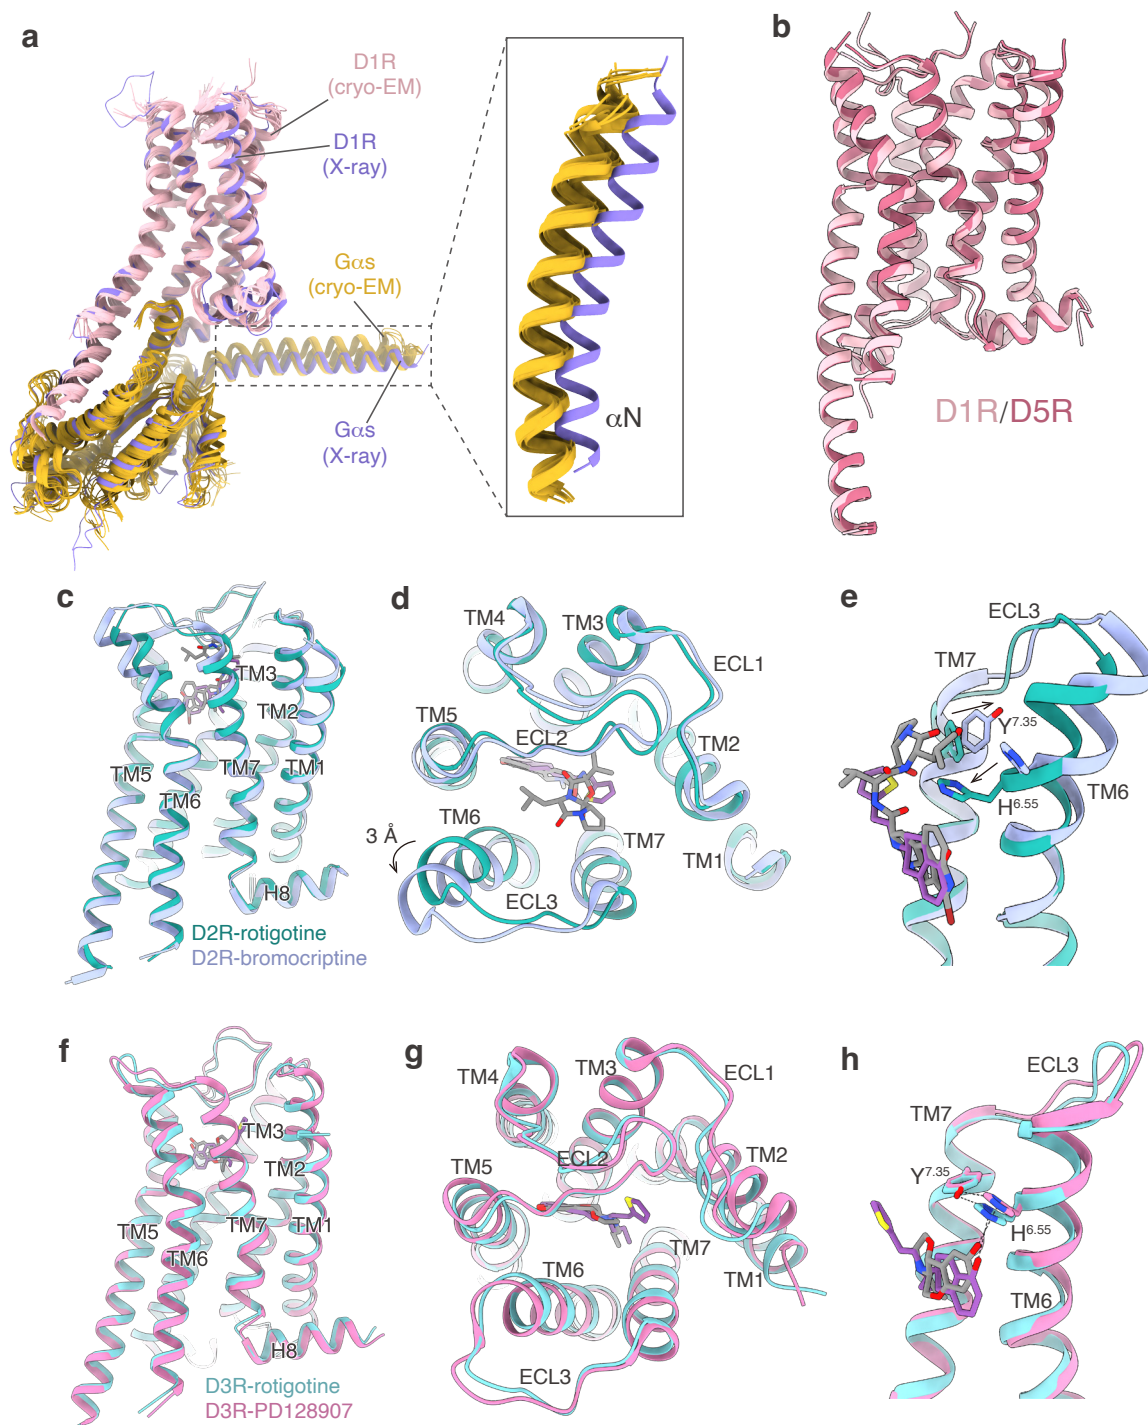

**Fig. S3. Structural comparison of active dopamine receptors.** **a** Superposition of the cryo-EM D1R-G<sub>s</sub> structures (pink) and the X-ray D1R-G<sub>s</sub> structure (purple, PDB code: 7JOZ). **b** Superposition of D1R and D5R structure. **c-e** Structural features of active rotigotine-D2R compared with that of bromocriptine-D2R. **c**, Comparison of overall receptor structures. **d**, Comparison of ligand recognition. **e**, The structural difference in TM6 and TM7. **f-h** Structural features of active rotigotine-D3R compared with that of PD128907-D3R. **f**, Comparison of overall receptor structures. **g**, Comparison of ligand recognition. **h**, The structural superposition of TM6 and TM7.
