# Supplementary material
Source: PubMed Central journal article supplement (PMC10397222)
Supplement: 41422_2023_808_MOESM4_ESM.pdf [file 41422_2023_808_MOESM4_ESM.pdf]

Supplementary information, Fig. S4

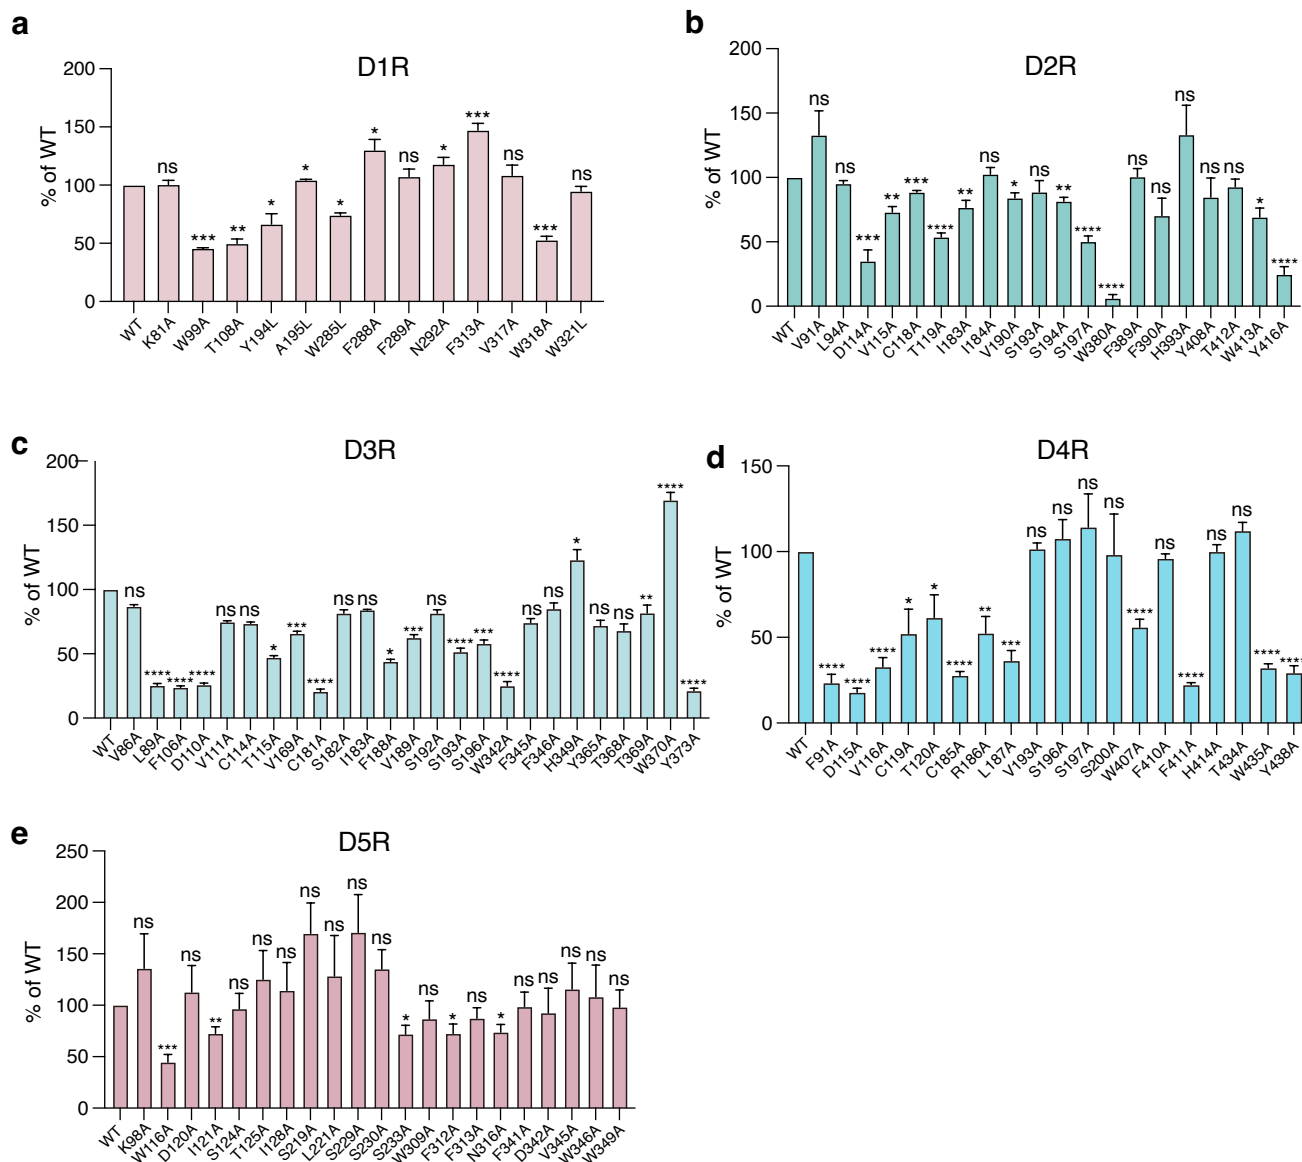

**Fig. S4. Expression level of WT and mutated dopamine receptors.** The experiments were performed for minimum of 3 independent assays in at least triplicate. Values are mean  $\pm$  SEM and moralized by WT. \*P < 0.05, \*\*P < 0.01, \*\*\*P < 0.001, \*\*\*\*P < 0.0001, ns, not significant (two-tailed unpaired t-test).
