# Supplementary material
Source: PubMed Central journal article supplement (PMC10397222)
Supplement: 41422_2023_808_MOESM6_ESM.pdf [file 41422_2023_808_MOESM6_ESM.pdf]

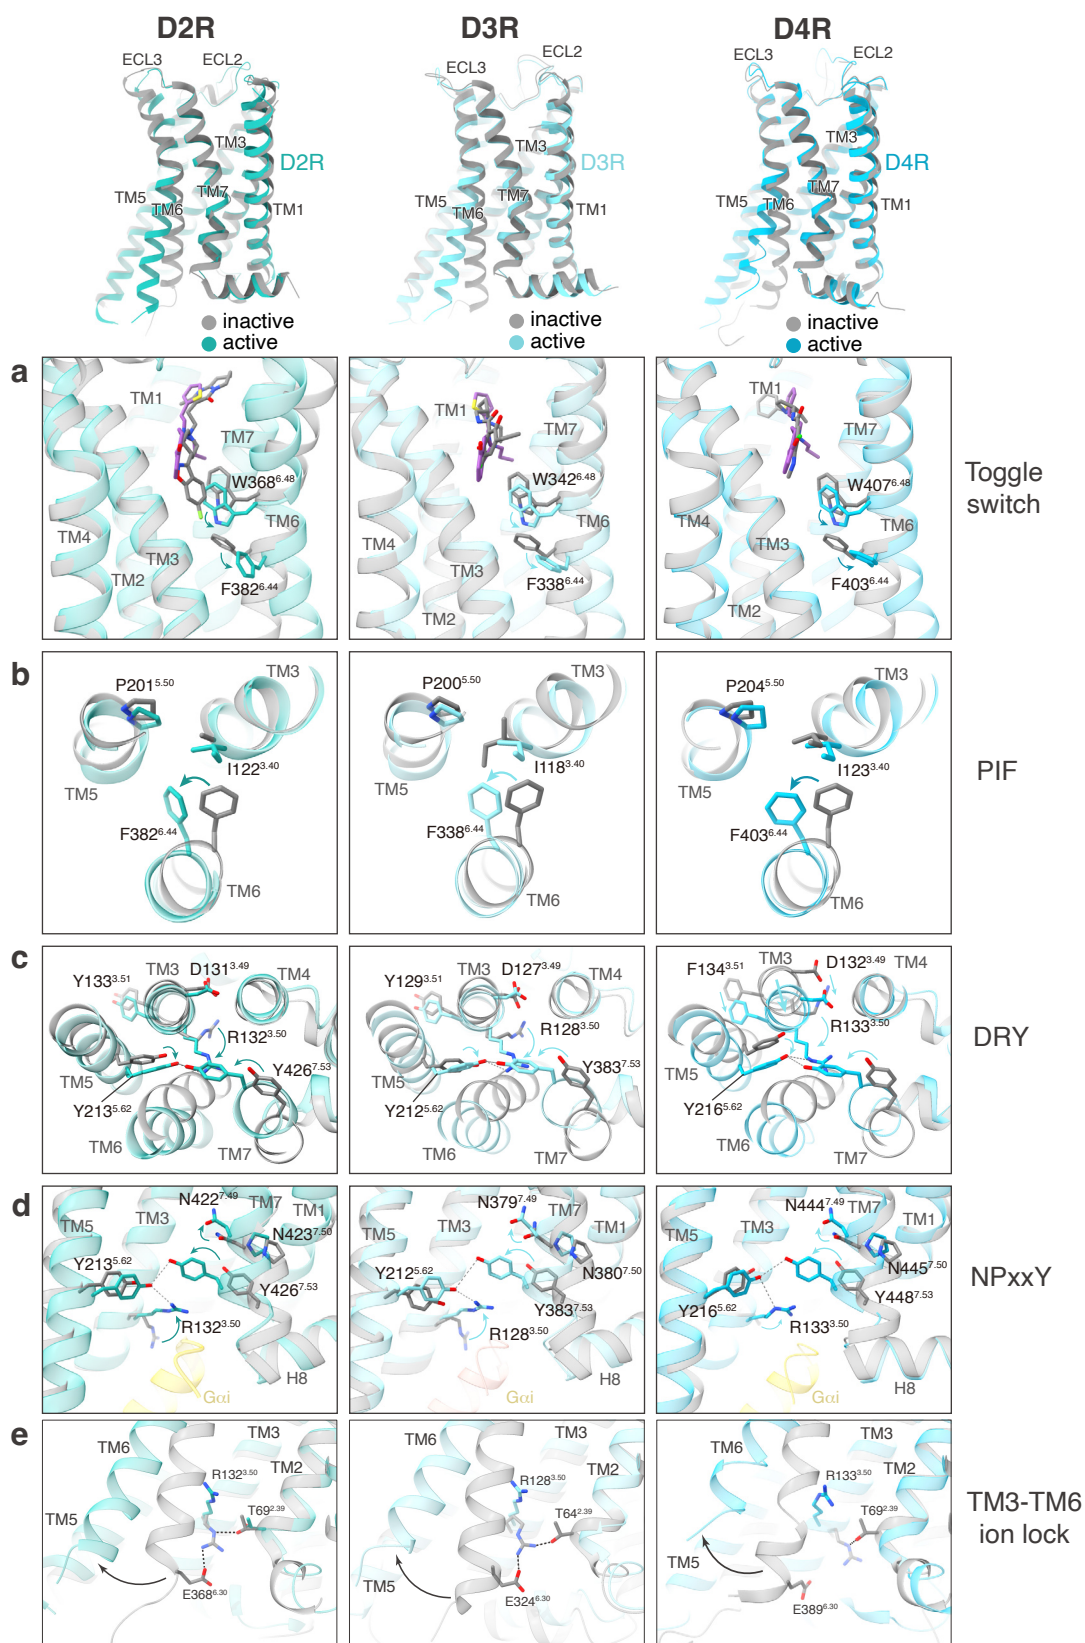

**Fig. S6. D2-like receptors activation.** **a** Toggle switch induced by agonist binding in D2R, D3R, and D4R. **b** Conformational change of PIF motif in D2R, D3R, and D4R. **c** Conformational change of DRY motif in D2R, D3R, and D4R. **d** Rotation of the NPxxY motif in D2R, D3R, and D4R. **e** The breaking of TM3-TM6 ion lock of D2R, D3R, and D4R.
