# Supplementary material
Source: PubMed Central journal article supplement (PMC10397222)
Supplement: 41422_2023_808_MOESM7_ESM.pdf [file 41422_2023_808_MOESM7_ESM.pdf]

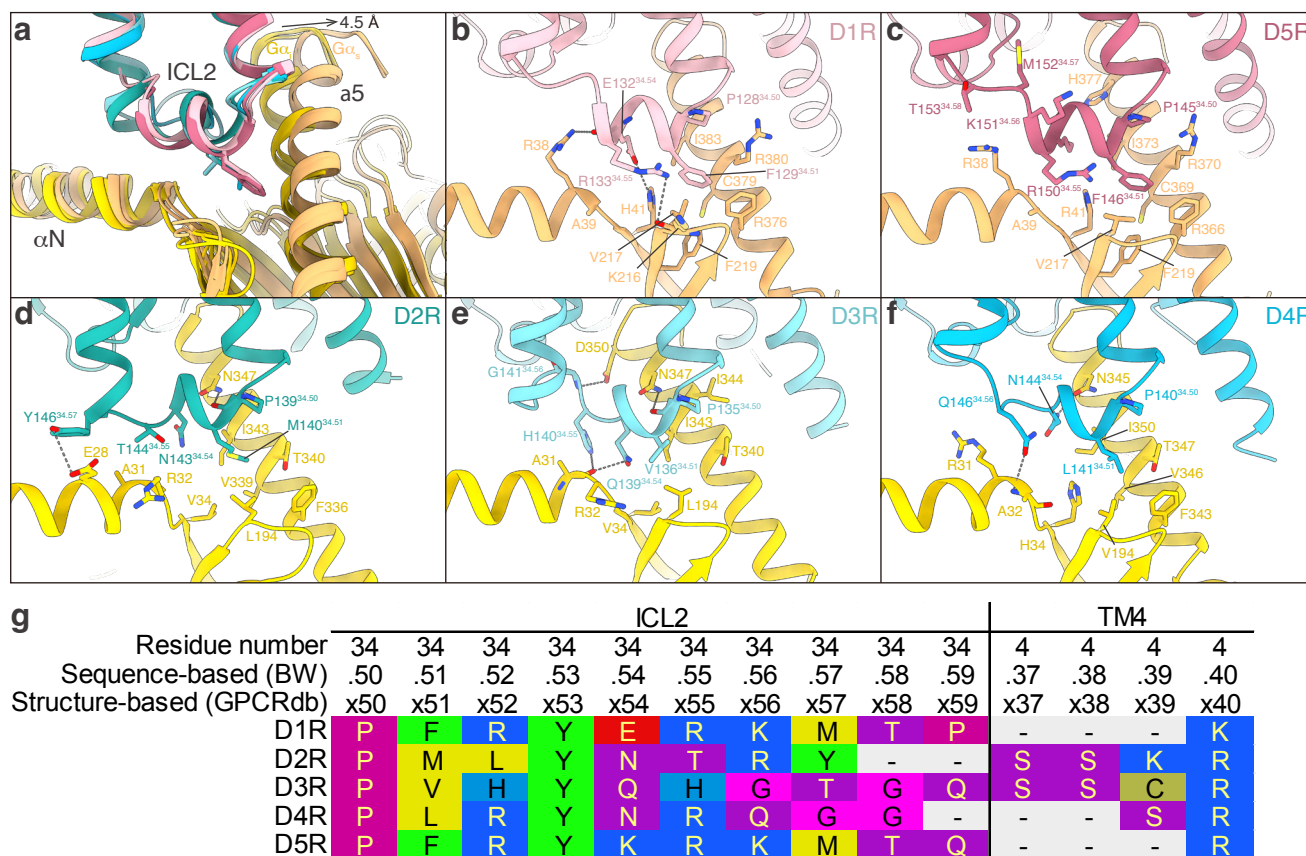

**Fig. S7. ICL2-G protein interaction of dopamine receptors.** **a** Super position of the ICL2-G protein structure of the five dopamine receptor-G protein complexes. **b** D1R ICL2-G protein interaction. **c** D2R ICL2-G protein interaction. **d** D3R ICL2-G protein interaction. **e** D4R ICL2-G protein interaction. **f** D5R ICL2-G protein interaction. **g** ICL2 sequence alignment of dopamine receptors, which generated on GPCRdb<sup>1</sup>.

1. Kooistra, A. J. et al. GPCRdb in 2021: integrating GPCR sequence, structure and function. *Nucleic Acids Res.* **49**, D335–D343 (2021).
