# Supplementary material
Source: PubMed Central journal article supplement (PMC10397222)
Supplement: 41422_2023_808_MOESM8_ESM.pdf [file 41422_2023_808_MOESM8_ESM.pdf]

# Supplementary information, Fig. S8

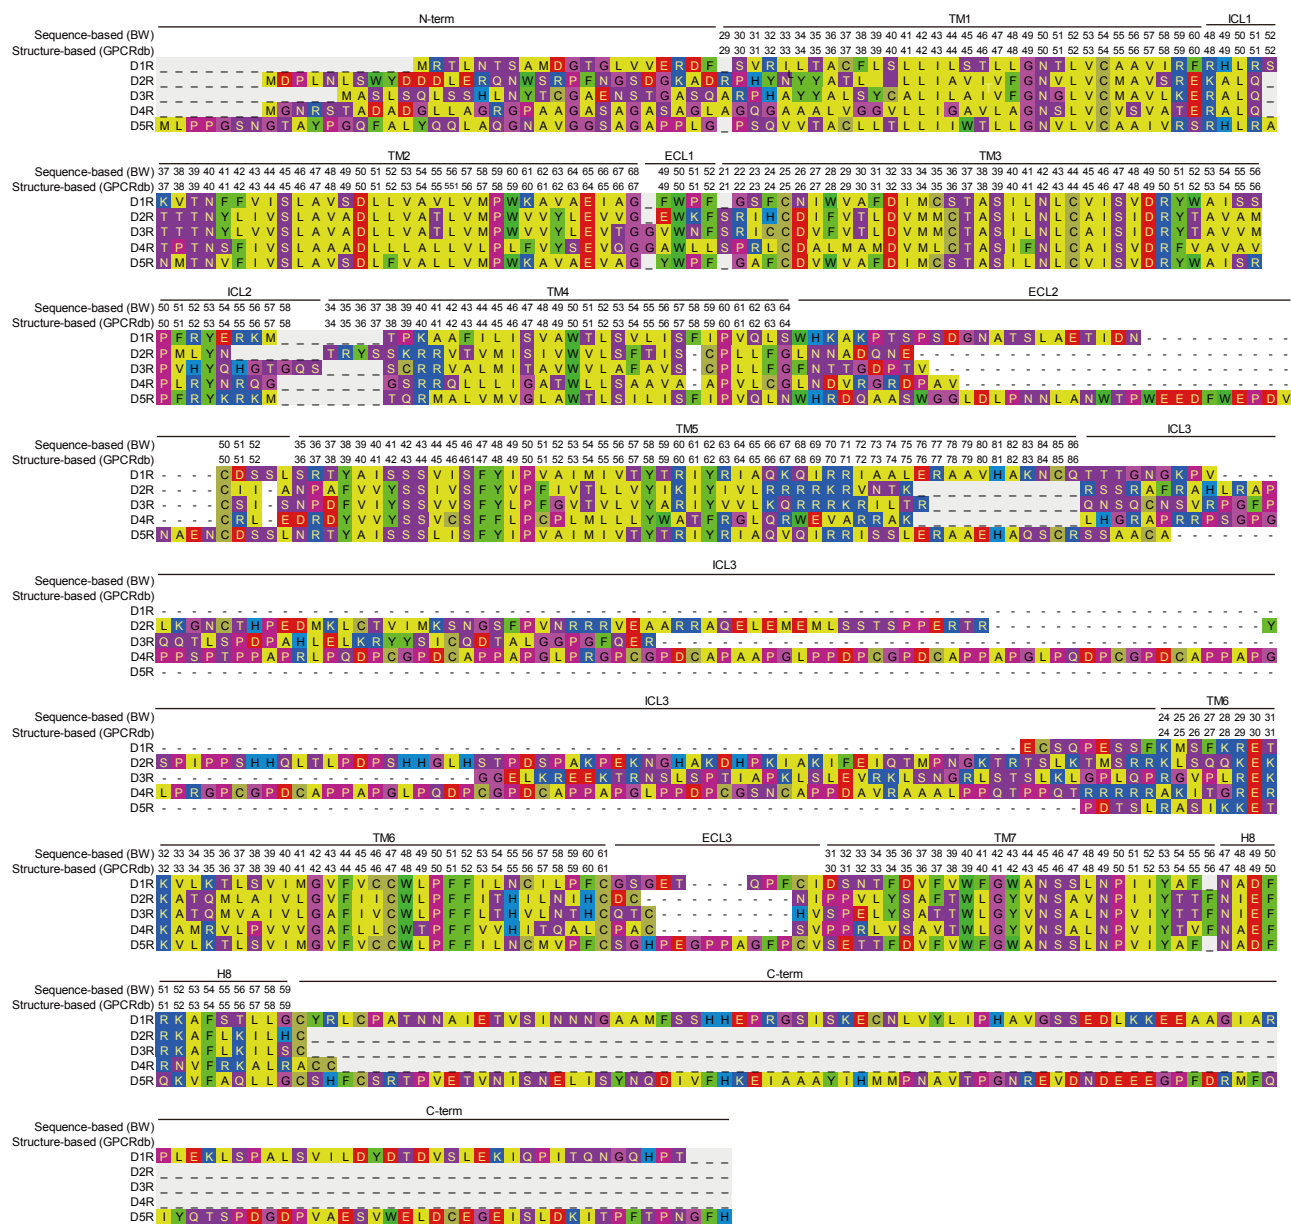

**Fig. S8. Sequence alignment of dopamine receptors (gpcrdb.org)<sup>1</sup>.**

1. Kooistra, A. J. et al. GPCRdb in 2021: integrating GPCR sequence, structure and function. *Nucleic Acids Res.* **49**, D335–D343 (2021).
