# Supplementary material
Source: PubMed Central journal article supplement (PMC10397222)
Supplement: 41422_2023_808_MOESM9_ESM.pdf [file 41422_2023_808_MOESM9_ESM.pdf]

**Table S1. Cryo-EM data collection, model refinement, and validation statistics.**

| <b>Data Collection and Processing</b>               | <b>D1R-G<sub>s</sub>-<br/>Rotigotine</b> | <b>D2R-G<sub>i</sub>-<br/>Rotigotine</b> | <b>D3R-G<sub>i</sub>-<br/>Rotigotine</b> | <b>D4R-G<sub>i</sub>-<br/>Rotigotine</b> | <b>D5R-G<sub>s</sub>-<br/>Rotigotine</b> |
|-----------------------------------------------------|------------------------------------------|------------------------------------------|------------------------------------------|------------------------------------------|------------------------------------------|
| EMDB accession number                               | EMD-35683                                | EMD-35684                                | EMD-35685                                | EMD-35686                                | EMD-35687                                |
| PDB accession number                                | 8IRR                                     | 8IRS                                     | 8IRT                                     | 8IRU                                     | 8IRV                                     |
| Magnification                                       | 46,296                                   | 46,296                                   | 46,685                                   | 49,310                                   | 49,310                                   |
| Voltage (kV)                                        | 300                                      | 300                                      | 300                                      | 300                                      | 300                                      |
| Electron exposure (e <sup>-</sup> /Å <sup>2</sup> ) | 60                                       | 60                                       | 70                                       | 64                                       | 64                                       |
| Defocus range (μm)                                  | -1.2 to -2.2                             | -1.0 to -3.0                             | -1.2 to -2.2                             | -1.2 to -2.2                             | -1.2 to -2.2                             |
| Pixel size (Å)                                      | 1.08                                     | 1.045                                    | 1.071                                    | 1.08                                     | 1.071                                    |
| Symmetry imposed                                    | C1                                       | C1                                       | C1                                       | C1                                       | C1                                       |
| Initial particle projections (no.)                  | 2,685,434                                | 7,064,860                                | 8,770,602                                | 4,333,829                                | 7,900,346                                |
| Final particle projections (no.)                    | 448,516                                  | 140,237                                  | 1,786,008                                | 471,638                                  | 2,652,297                                |
| Map resolution (Å)                                  | 3.2                                      | 3.0                                      | 2.7                                      | 3.2                                      | 3.1                                      |
| FSC threshold                                       | 0.143                                    | 0.143                                    | 0.143                                    | 0.143                                    | 0.143                                    |
| Map resolution range (Å)                            | 2.5-5.0                                  | 2.5-5.0                                  | 2.5-5.0                                  | 2.5-5.0                                  | 2.5-5.0                                  |
| <b>Refinement</b>                                   |                                          |                                          |                                          |                                          |                                          |
| Initial model used                                  | 7JVQ                                     | 7JVR                                     | 7CMV                                     | 7CMV                                     | 7JVQ                                     |
| Model resolution (Å)                                | 3.2                                      | 3.2                                      | 2.7                                      | 3.3                                      | 3.3                                      |
| FSC threshold                                       | 0.5                                      | 0.5                                      | 0.5                                      | 0.5                                      | 0.5                                      |
| <b>Model Composition</b>                            |                                          |                                          |                                          |                                          |                                          |
| Non-hydrogen atoms                                  | 8,249                                    | 8,764                                    | 8,768                                    | 9,007                                    | 7,465                                    |
| Protein residues                                    | 1,032                                    | 1121                                     | 1,122                                    | 1,123                                    | 912                                      |
| Ligands                                             | 1                                        | 1                                        | 1                                        | 1                                        | 1                                        |
| Lipids                                              | 3                                        | 0                                        | 0                                        | 9                                        | 8                                        |
| Waters                                              | 2                                        | 0                                        | 2                                        | 0                                        | 0                                        |
| B factors (Å <sup>2</sup> )                         |                                          |                                          |                                          |                                          |                                          |
| Protein                                             | 71.64                                    | 69.16                                    | 32.81                                    | 74.96                                    | 45.37                                    |
| Ligand                                              | 31.30                                    | 117.83                                   | 15.50                                    | 25.04                                    | 21.63                                    |
| <b>RMSD</b>                                         |                                          |                                          |                                          |                                          |                                          |
| Bound lengths (Å)                                   | 0.012                                    | 0.012                                    | 0.012                                    | 0.012                                    | 0.013                                    |
| Bound angles (°)                                    | 1.927                                    | 1.965                                    | 2.015                                    | 1.881                                    | 1.840                                    |
| <b>Validation</b>                                   |                                          |                                          |                                          |                                          |                                          |
| MolProbity score                                    | 1.08                                     | 1.01                                     | 1.11                                     | 0.84                                     | 0.86                                     |
| Clashscore                                          | 1.09                                     | 0.57                                     | 0.98                                     | 0.28                                     | 0.40                                     |
| Rotamer outliers (%)                                | 0                                        | 0                                        | 0                                        | 0                                        | 0                                        |
| <b>Ramachandran Plot</b>                            |                                          |                                          |                                          |                                          |                                          |
| Favored (%)                                         | 96.15                                    | 95.48                                    | 95.47                                    | 96.39                                    | 96.65                                    |
| Allowed (%)                                         | 3.85                                     | 4.52                                     | 4.53                                     | 3.61                                     | 3.35                                     |
| Disallowed (%)                                      | 0                                        | 0                                        | 0                                        | 0                                        | 0                                        |
