# Supplementary material
Source: PubMed Central journal article supplement (PMC10397222)
Supplement: 41422_2023_808_MOESM11_ESM.pdf [file 41422_2023_808_MOESM11_ESM.pdf]

**Table S3. G<sub>i</sub>-mediated cAMP accumulation assay results of D2R.**

Potency (pEC<sub>50</sub>) were extracted from a minimum of 3 independent assays in at least triplicate. pEC<sub>50</sub> displayed values are mean ± SEM. Delta FOB for difference in either Fold of Basal (FOB) or Delta pEC<sub>50</sub> when compared to wild-type receptor value. Average Emax and basal values were determined from “log(agonist) vs. response – Variable slope (four parameters) or log(inhibition) vs. response – Variable slope (four parameters)” function in Graphpad Prism 8.4 software (Graphpad Software Inc., San Diego, CA) and were divided by 10<sup>3</sup> for display, basal values are enclosed with parentheses in the table column. Color scheme is based on the effects of mutations on relative pEC<sub>50</sub> and Fold of Basal (FOB) values with red for reduced potency/efficacy and blue for increased potency/efficacy when compared to wild-type values for each ligand. ND - not determined.

| BW   | D2-Dopamine |                        |           |      |                   |                    | D2R-Rotigotine         |           |      |                   |                    |
|------|-------------|------------------------|-----------|------|-------------------|--------------------|------------------------|-----------|------|-------------------|--------------------|
|      |             | Emax (Basal)           | FOB       | ΔFOB | pEC <sub>50</sub> | ΔpEC <sub>50</sub> | Emax (Basal)           | FOB       | ΔFOB | pEC <sub>50</sub> | ΔpEC <sub>50</sub> |
|      | WT          | 1.3 ± 0.5 (10 ± 3.8)   | 7.1 ± 0.5 | 0    | 9.59 ± 0.11       | 0                  | 1.8 ± 0.4 (13.8 ± 4)   | 7.6 ± 0.9 | 0    | 11.1 ± 0.15       | 0.00               |
| 2.61 | V91A        | 2.1 ± 0.9 (13 ± 5.1)   | 6.3 ± 0.2 | -0.8 | 10.11 ± 0.06      | 0.52               | 2.7 ± 0.1 (18 ± 0.1)   | 6.5 ± 0.7 | -0.6 | 10.73 ± 0.15      | -0.37              |
| 2.64 | L94A        | 1.9 ± 0.9 (10.3 ± 5.1) | 5 ± 0.3   | -2.1 | 9.47 ± 0.06       | -0.12              | 2.7 ± 0.7 (14 ± 4.5)   | 4.8 ± 0.6 | -2.3 | 10.45 ± 0.17      | -0.65              |
| 3.32 | D114A       | N.D.                   | N.D.      | N.D. | N.D.              | N.D.               | 5.8 ± 2.0 (18.2 ± 6.1) | 3.1 ± 0.1 | -4.0 | 4.84 ± 0.22       | -6.26              |
| 3.33 | V115A       | 2.2 ± 0.6 (13.4 ± 4.7) | 5.8 ± 0.4 | -1.3 | 7.65 ± 0.02       | -1.94              | 2.7 ± 0.6 (15.8 ± 3.5) | 5.8 ± 0.3 | -1.3 | 9.35 ± 0.06       | -1.75              |
| 3.36 | C118A       | 6.0 ± 1.4 (19.1 ± 4.1) | 3.2 ± 0.1 | -3.9 | 6.9 ± 0.36        | -2.69              | 4.4 ± 0.4 (22.2 ± 4.3) | 4.9 ± 0.6 | -2.2 | 8.55 ± 0.02       | -2.55              |
| 3.37 | T119A       | 4.9 ± 0.8 (11.8 ± 3.4) | 2.3 ± 0.3 | -4.8 | 5.64 ± 0.07       | -3.95              | 1.8 ± 0.3 (13.7 ± 3.0) | 7.2 ± 0.5 | 0.1  | 9.79 ± 0.19       | -1.31              |
| ECL2 | I183A       | 2.1 ± 0.4 (12.8 ± 3.5) | 5.7 ± 0.6 | -1.4 | 9.74 ± 0.01       | 0.15               | 2.1 ± 0.3 (14.0 ± 3.2) | 6.4 ± 0.7 | -0.7 | 10.82 ± 0.20      | -0.28              |
| ECL2 | I184A       | 2.3 ± 0.5 (9.3 ± 3)    | 3.8 ± 0.4 | -3.3 | 7.58 ± 0.07       | -2.01              | 2.1 ± 0.4 (11.6 ± 3.0) | 5.1 ± 0.7 | -2.0 | 10.49 ± 0.19      | -0.61              |
| 5.39 | V190A       | 1.7 ± 0.6 (9.7 ± 3.8)  | 5.4 ± 0.3 | -1.7 | 7.61 ± 0.08       | -1.98              | 2.1 ± 0.5 (12.8 ± 3.9) | 5.7 ± 0.6 | -1.4 | 10.75 ± 0.22      | -0.35              |
| 5.42 | S193A       | 2.4 ± 0.3 (14 ± 4.6)   | 5.5 ± 1.5 | -1.6 | 6.34 ± 0.03       | -3.25              | 2.4 ± 0.4 (15.7 ± 3.6) | 6.1 ± 0.6 | -1.0 | 8.60 ± 0.09       | -2.50              |
| 5.43 | S194A       | 2.1 ± 0.3 (14.5 ± 4.8) | 6.3 ± 1.2 | -0.8 | 8.82 ± 0.11       | -0.77              | N.D.                   | N.D.      | N.D. | N.D.              | N.D.               |
| 5.46 | S197A       | 7.5 ± 2.8 (12.3 ± 3.7) | 1.8 ± 0.2 | -5.3 | 6 ± 0.02          | -3.59              | 1.8 ± 0.4 (12.6 ± 3.9) | 6.8 ± 0.7 | -0.3 | 10.88 ± 0.15      | -0.22              |
| 6.48 | W386A       | N.D.                   | N.D.      | N.D. | N.D.              | N.D.               | N.D.                   | N.D.      | N.D. | N.D.              | N.D.               |
| 6.51 | F389A       | N.D.                   | N.D.      | N.D. | N.D.              | N.D.               | 3.4 ± 1.0 (9.9 ± 3.5)  | 2.7 ± 0.4 | -4.4 | 6.67 ± 0.43       | -4.43              |
| 6.52 | F390A       | 1.8 ± 0.4 (10.9 ± 2.7) | 6.2 ± 0.1 | -0.9 | 9.03 ± 0.26       | -0.56              | 2.0 ± 0.5 (11.5 ± 2.7) | 5.9 ± 0.2 | -1.2 | 9.72 ± 0.13       | -1.38              |
| 6.55 | H393A       | 2.8 ± 0.7 (15.1 ± 4.4) | 5.3 ± 0.2 | -1.8 | 7.56 ± 0.16       | -2.03              | 2.3 ± 0.4 (14.2 ± 3.8) | 6.0 ± 0.8 | -1.1 | 10.74 ± 0.13      | -0.36              |
| 7.35 | Y408A       | 1.3 ± 0.3 (8.6 ± 1.9)  | 6.4 ± 0.2 | -0.7 | 8.6 ± 0.12        | -0.99              | 1.5 ± 0.3 (9.2 ± 1.9)  | 6.1 ± 0.6 | -1.0 | 10.72 ± 0.08      | -0.38              |
| 7.39 | T412A       | 1.6 ± 0.5 (12.8 ± 4.6) | 8.4 ± 1.2 | 1.3  | 9.33 ± 0.16       | -0.26              | 2.3 ± 0.6 (14.4 ± 4.5) | 6.0 ± 0.5 | -1.1 | 11.57 ± 0.13      | 0.47               |
| 7.43 | Y416A       | 3.3 ± 0.5 (11.9 ± 3.5) | 3.4 ± 0.6 | -3.7 | 5.59 ± 0.12       | -4                 | 11.2 ± 0.6 (17 ± 0.3)  | 1.5 ± 0.1 | -5.6 | 7.23 ± 0.14       | -3.87              |
