# Supplementary material
Source: PubMed Central journal article supplement (PMC10397222)
Supplement: 41422_2023_808_MOESM12_ESM.pdf [file 41422_2023_808_MOESM12_ESM.pdf]

**Table S4. G<sub>i</sub>-mediated cAMP accumulation assay results of D3R.**

Potency (pEC<sub>50</sub>) were extracted from a minimum of 3 independent assays in at least triplicate. pEC<sub>50</sub> displayed values are mean ± SEM. Delta FOB for difference in either Fold of Basal (FOB) or Delta pEC<sub>50</sub> when compared to wild-type receptor value. Average E<sub>max</sub> and basal values were determined from “log(agonist) vs. response – Variable slope (four parameters) or log(inhibition) vs. response – Variable slope (four parameters)” function in Graphpad Prism 8.4 software (Graphpad Software Inc., San Diego, CA) and were divided by 10<sup>3</sup> for display, basal values are enclosed with parentheses in the table column. Color scheme is based on the effects of mutations on relative pEC<sub>50</sub> and Fold of Basal (FOB) values with red for reduced potency/efficacy and blue for increased potency/efficacy when compared to wild-type values for each ligand. ND - not determined.

| BW   | D3-Dopamine |                         |           |      |                   |                    | D3R-Rotigotine         |           |      |                   |                    |  |
|------|-------------|-------------------------|-----------|------|-------------------|--------------------|------------------------|-----------|------|-------------------|--------------------|--|
|      |             | Emax (Basal)            | FOB       | ΔFOB | pEC <sub>50</sub> | ΔpEC <sub>50</sub> | Emax (Basal)           | FOB       | ΔFOB | pEC <sub>50</sub> | ΔpEC <sub>50</sub> |  |
|      | WT          | 2.0 ± 0.1 (8.4 ± 0.2)   | 4.2 ± 0.1 | 0    | 9.94 ± 0.12       | 0                  | 1.8 ± 0.2 (6.2 ± 0.5)  | 3.5 ± 0.1 | 0    | 9.56 ± 0.02       | 0.00               |  |
| 2.61 | V86A        | 2.1 ± 0.2 (7.3 ± 0.6)   | 3.4 ± 0.1 | -0.8 | 9.83 ± 0.05       | -0.11              | 2.4 ± 0.1 (6.6 ± 0.1)  | 2.8 ± 0.1 | -1.4 | 9.38 ± 0.06       | -0.18              |  |
| 2.64 | L89A        | 2.0 ± 0.3 (3.2 ± 0.6)   | 1.6 ± 0.1 | -2.6 | 9.55 ± 0.46       | -0.39              | 2.7 ± 0.5 (3.5 ± 0.7)  | 1.3 ± 0.1 | -2.9 | 9.61 ± 0.13       | 0.05               |  |
| 3.28 | F106A       | 4.5 ± 0.8 (8.5 ± 1.5)   | 1.9 ± 0   | -2.3 | 9.03 ± 0.41       | -0.91              | 3.7 ± 0.7 (5.6 ± 0.9)  | 1.6 ± 0.1 | -2.6 | 9.21 ± 0.13       | -0.35              |  |
| 3.32 | D110A       | N.D.                    | N.D.      | N.D. | N.D.              | N.D.               | N.D.                   | N.D.      | N.D. | N.D.              | N.D.               |  |
| 3.33 | V111A       | 2.3 ± 0.1 (8.3 ± 0.1)   | 3.6 ± 0.2 | -0.6 | 9.57 ± 0.06       | -0.37              | 2.2 ± 0.1 (6.7 ± 0.3)  | 3.1 ± 0.2 | -1.1 | 9.67 ± 0.07       | 0.11               |  |
| 3.36 | C114A       | 1.4 ± 0.2 (5.8 ± 0.7)   | 4.1 ± 0.2 | -0.1 | 7.54 ± 0.07       | -2.4               | 1.6 ± 0.2 (3.8 ± 0.5)  | 2.3 ± 0.1 | -1.9 | 8.63 ± 0.02       | -0.93              |  |
| 3.37 | T115A       | 3.9 ± 0.3 (6.9 ± 0.6)   | 1.8 ± 0.1 | -2.4 | 6.93 ± 0.12       | -3.01              | 2.9 ± 0.4 (6.6 ± 0.8)  | 2.3 ± 0.1 | -1.9 | 9.62 ± 0.06       | 0.06               |  |
| 4.56 | V164A       | 1.7 ± 0.6 (4.6 ± 1.5)   | 2.6 ± 0.1 | -1.6 | 9.57 ± 0.15       | -0.37              | 2.4 ± 0.6 (5.5 ± 1.5)  | 2.3 ± 0.1 | -1.9 | 9.81 ± 0.02       | 0.25               |  |
| ECL2 | C181A       | N.D.                    | N.D.      | N.D. | N.D.              | N.D.               | N.D.                   | N.D.      | N.D. | N.D.              | N.D.               |  |
| ECL2 | S182A       | 1.7 ± 0.5 (6.1 ± 1.7)   | 3.6 ± 0.1 | -0.6 | 9.91 ± 0.09       | -0.03              | 2.0 ± 0.5 (6.6 ± 1.6)  | 3.3 ± 0.2 | -0.9 | 9.85 ± 0.03       | 0.29               |  |
| ECL2 | I183A       | 2.2 ± 0.1 (8.1 ± 1.0)   | 3.6 ± 0.2 | -0.6 | 9 ± 0.12          | -0.94              | 2.2 ± 0.3 (8.0 ± 1.2)  | 3.5 ± 0.2 | -0.7 | 10.09 ± 0.04      | 0.53               |  |
| 5.38 | F188A       | 2.3 ± 0.1 (8.3 ± 0.3)   | 3.6 ± 0.1 | -0.6 | 6.34 ± 0.03       | -3.6               | 2.5 ± 0.1 (5.6 ± 0.2)  | 2.2 ± 0.1 | -2.0 | 8.62 ± 0.06       | -0.94              |  |
| 5.39 | V189A       | 3.2 ± 0.5 (8.7 ± 1.4)   | 2.7 ± 0.1 | -1.5 | 8.64 ± 0.05       | -1.3               | 3.0 ± 0.5 (8.2 ± 1.7)  | 2.6 ± 0.2 | -1.6 | 9.53 ± 0.04       | -0.03              |  |
| 5.42 | S192A       | 2.7 ± 0.5 (7.5 ± 1.8)   | 2.8 ± 0.2 | -1.4 | 7.7 ± 0.09        | -2.24              | 3.3 ± 0.6 (7.4 ± 1.7)  | 2.2 ± 0.2 | -2.0 | 8.82 ± 0.07       | -0.74              |  |
| 5.43 | S193A       | 1.6 ± 0.2 (3.9 ± 0.8)   | 2.4 ± 0.3 | -1.8 | 9.11 ± 0.46       | -0.83              | 1.5 ± 0.2 (3.8 ± 0.8)  | 2.4 ± 0.2 | -1.8 | 9.53 ± 0.10       | -0.03              |  |
| 5.46 | S196A       | 11.4 ± 1.5 (14.1 ± 1.8) | 1.2 ± 0   | -3   | 7.37 ± 0.19       | -2.57              | 4.0 ± 0.5 (12.9 ± 2.5) | 3.2 ± 0.3 | -1.0 | 9.69 ± 0.04       | 0.13               |  |
| 6.48 | W342A       | 5.5 ± 0.5 (6.8 ± 0.8)   | 1.2 ± 0   | -3   | 9.38 ± 0.47       | -0.56              | 4.6 ± 0.7 (5.6 ± 0.8)  | 1.2 ± 0.1 | -3.0 | 10.47 ± 0.35      | 0.91               |  |
| 6.51 | F345A       | 2.0 ± 0.3 (8.1 ± 0.8)   | 4.2 ± 0.5 | 0    | 5.49 ± 0.02       | -4.45              | 2.6 ± 0.3 (6.4 ± 0.8)  | 2.5 ± 0.1 | -1.7 | 6.91 ± 0.04       | -2.65              |  |
| 6.52 | F346A       | 2.5 ± 0.2 (7.6 ± 0.4)   | 3.1 ± 0.2 | -1.1 | 10.2 ± 0.39       | 0.26               | 2.1 ± 0.2 (5.8 ± 0.6)  | 2.8 ± 0.1 | -1.4 | 9.42 ± 0.05       | -0.14              |  |
| 6.55 | H349A       | 3.8 ± 0.2 (10 ± 0.1)    | 2.7 ± 0.1 | -1.5 | 8.93 ± 0.4        | -1.01              | N.D.                   | N.D.      | N.D. | N.D.              | N.D.               |  |
| 7.35 | Y365A       | 2.4 ± 0.3 (7.4 ± 1)     | 3 ± 0.1   | -1.2 | 9.57 ± 0.61       | -0.37              | 2.2 ± 0.2 (6.1 ± 0.8)  | 2.7 ± 0.1 | -1.5 | 9.36 ± 0.1        | -0.20              |  |
| 7.38 | T368A       | 1.9 ± 0.2 (6.7 ± 0.9)   | 3.4 ± 0.1 | -0.8 | 10.29 ± 0.42      | 0.35               | 1.7 ± 0.1 (5.2 ± 0.8)  | 3.0 ± 0.2 | -1.2 | 9.73 ± 0.03       | 0.17               |  |
| 7.39 | T369A       | 2.7 ± 0.4 (8.1 ± 1.5)   | 3 ± 0.1   | -1.2 | 10.15 ± 0.41      | 0.21               | 2.5 ± 0.3 (7.4 ± 1.5)  | 2.9 ± 0.2 | -1.3 | 9.83 ± 0.09       | 0.27               |  |
| 7.43 | Y373A       | 3.1 ± 0.1 (4.4 ± 0.1)   | 1.4 ± 0   | -2.8 | 5.85 ± 0.13       | -4.09              | N.D.                   | N.D.      | N.D. | N.D.              | N.D.               |  |
