# Supplementary material
Source: PubMed Central journal article supplement (PMC10397222)
Supplement: 41422_2023_808_MOESM13_ESM.pdf [file 41422_2023_808_MOESM13_ESM.pdf]

**Table S5. G<sub>i</sub>-mediated cAMP accumulation assay results of D4R.**

Potency (pEC50) were extracted from a minimum of 3 independent assays in at least triplicate. pEC50 displayed values are mean ± SEM. Delta FOB for difference in either Fold of Basal (FOB) or Delta pEC50 when compared to wild-type receptor value. Average Emax and basal values were determined from “log(agonist) vs. response – Variable slope (four parameters) or log(inhibition) vs. response – Variable slope (four parameters)” function in Graphpad Prism 8.4 software (Graphpad Software Inc., San Diego, CA) and were divided by 10<sup>3</sup> for display, basal values are enclosed with parentheses in the table column. Color scheme is based on the effects of mutations on relative pEC50 and Fold of Basal (FOB) values with red for reduced potency/efficacy and blue for increased potency/efficacy when compared to wild-type values for each ligand. ND - not determined.

| BW   | D4-Dopamine |                        |           |      |              |        | D4R-Rotigotine        |           |      |              |        |
|------|-------------|------------------------|-----------|------|--------------|--------|-----------------------|-----------|------|--------------|--------|
|      |             | Emax (Basal)           | FOB       | ΔFOB | pEC50        | ΔpEC50 | Emax (Basal)          | FOB       | ΔFOB | pEC50        | ΔpEC50 |
|      | WT          | 1.4 ± 0.1 (6.0 ± 0.5)  | 4.2 ± 0.1 | 0    | 10.38 ± 0.13 | 0      | 1.5 ± 0.1 (6.3 ± 0.8) | 4.1 ± 0.4 | 0    | 9.80 ± 0.10  | 0.00   |
| 2.61 | F91A        | 1.4 ± 0.2 (4.3 ± 0.8)  | 3.0 ± 0.1 | -1.2 | 8.25 ± 0.07  | -2.13  | 2.0 ± 0.1 (5.8 ± 0.1) | 2.9 ± 0.1 | -1.3 | 7.60 ± 0.04  | -2.20  |
| 3.32 | D115A       | N.D.                   | N.D.      | N.D. | N.D.         | N.D.   | N.D.                  | N.D.      | N.D. | N.D.         | N.D.   |
| 3.33 | V116A       | 1.5 ± 0 (4.5 ± 0.2)    | 3.0 ± 0.1 | -1.2 | 7.78 ± 0.08  | -2.6   | 1.6 ± 0 (4.6 ± 0.1)   | 2.9 ± 0.1 | -1.3 | 8.25 ± 0.10  | -1.55  |
| 3.36 | C119A       | 1.9 ± 0.1 (5.3 ± 0.3)  | 2.7 ± 0.1 | -1.5 | 7.58 ± 0.08  | -2.8   | 2.0 ± 0.1 (5.2 ± 0.1) | 2.7 ± 0.1 | -1.5 | 8.17 ± 0.07  | -1.63  |
| 3.37 | T120A       | 4.2 ± 0.3 (10.2 ± 1.3) | 2.4 ± 0.1 | -1.8 | 6.49 ± 0.10  | -3.89  | 2.5 ± 0.3 (9.6 ± 1.4) | 3.8 ± 0.2 | -0.4 | 9.41 ± 0.14  | -0.39  |
| ECL2 | C185A       | N.D.                   | N.D.      | N.D. | N.D.         | N.D.   | N.D.                  | N.D.      | N.D. | N.D.         | N.D.   |
| ECL2 | R186A       | 1.4 ± 0.1 (3.9 ± 0.1)  | 2.8 ± 0.1 | -1.4 | 9.22 ± 0.06  | -1.16  | 1.7 ± 0.1 (5.6 ± 0.8) | 3.3 ± 0.4 | -0.9 | 9.84 ± 0.27  | 0.04   |
| ECL2 | L187A       | 1.8 ± 0.1 (3.5 ± 0.5)  | 1.9 ± 0.1 | -2.3 | 7.53 ± 0.02  | -2.85  | 1.9 ± 0.1 (5.1 ± 0.8) | 2.6 ± 0.3 | -1.6 | 9.86 ± 0.24  | 0.06   |
| 5.39 | V193A       | 1.4 ± 0.1 (4.3 ± 0.2)  | 3.1 ± 0.1 | -1.1 | 8.50 ± 0.05  | -1.88  | 1.5 ± 0.1 (5.9 ± 0.7) | 4.1 ± 0.6 | -0.1 | 10.37 ± 0.33 | 0.57   |
| 5.42 | S196A       | 1.5 ± 0.2 (5.4 ± 0.5)  | 3.7 ± 0.2 | -0.5 | 7.94 ± 0.02  | -2.44  | 1.3 ± 0.3 (5.0 ± 0.5) | 4.4 ± 1.0 | 0.2  | 8.67 ± 0.25  | -1.13  |
| 5.43 | S197A       | 1.6 ± 0.3 (6.2 ± 0.7)  | 4.0 ± 0.2 | -0.2 | 9.76 ± 0.10  | -0.62  | 1.5 ± 0.3 (7.1 ± 0.1) | 5.6 ± 1.0 | 1.4  | 9.88 ± 0.62  | 0.08   |
| 5.46 | S200A       | 1.5 ± 0.1 (4.9 ± 0.5)  | 3.3 ± 0.1 | -0.9 | 6.45 ± 0.02  | -3.93  | 1.5 ± 0.2 (7.7 ± 1.5) | 5.0 ± 0.6 | 0.8  | 10.54 ± 0.11 | 0.74   |
| 6.48 | W407A       | 1.6 ± 0.5 (3.3 ± 0.1)  | 2.7 ± 0.9 | -1.5 | 5.68 ± 0.69  | -4.7   | N.D.                  | N.D.      | N.D. | N.D.         | N.D.   |
| 6.51 | F410A       | 2.7 ± 0.7 (3.3 ± 0.7)  | 1.6 ± 0.5 | -2.6 | 5.49 ± 0.11  | -4.89  | 2.0 ± 0.1 (4.4 ± 0.3) | 2.3 ± 0.1 | -1.9 | 6.30 ± 0.02  | -3.50  |
| 6.52 | F411A       | 2.0 ± 0.1 (3.6 ± 0.1)  | 1.8 ± 0.1 | -2.4 | 8.60 ± 0.16  | -1.78  | 2.7 ± 0.3 (4.1 ± 0.3) | 1.6 ± 0.1 | -2.6 | 8.19 ± 0.34  | -1.61  |
| 6.55 | H414A       | 1.5 ± 0.1 (5.5 ± 0.2)  | 3.7 ± 0.1 | -0.5 | 9.65 ± 0.10  | -0.73  | 1.8 ± 0.1 (6.7 ± 0.8) | 3.7 ± 0.3 | -0.5 | 10.04 ± 0.07 | 0.24   |
| 7.39 | T434A       | 1.1 ± 0 (2.2 ± 0.2)    | 2.0 ± 0.1 | -2.2 | 7.85 ± 0.12  | -2.53  | 1.3 ± 0.1 (2.6 ± 0.4) | 1.9 ± 0.2 | -2.3 | 9.78 ± 0.32  | -0.02  |
| 7.43 | Y438A       | 3.3 ± 0.3 (3.1 ± 0.4)  | 0.9 ± 0.1 | -3.3 | N.D.         | N.D.   | 4.9 ± 0.9 (5.7 ± 1.3) | 1.1 ± 0.1 | -3.1 | N.D.         | N.D.   |
