# Supplementary material
Source: PubMed Central journal article supplement (PMC10397222)
Supplement: 41422_2023_808_MOESM14_ESM.pdf [file 41422_2023_808_MOESM14_ESM.pdf]

**Table S6. G<sub>s</sub>-mediated cAMP accumulation assay results of D5R.**

Potency (pEC<sub>50</sub>) were extracted from a minimum of 3 independent assays in at least triplicate. pEC<sub>50</sub> displayed values are mean ± SEM. Delta FOB for difference in either Fold of Basal (FOB) or Delta pEC<sub>50</sub> when compared to wild-type receptor value. Average E<sub>max</sub> and basal values were determined from “log(agonist) vs. response – Variable slope (four parameters) or log(inhibition) vs. response – Variable slope (four parameters)” function in Graphpad Prism 8.4 software (Graphpad Software Inc., San Diego, CA) and were divided by 10<sup>3</sup> for display, basal values are enclosed with parentheses in the table column. Color scheme is based on the effects of mutations on relative pEC<sub>50</sub> and Fold of Basal (FOB) values with red for reduced potency/efficacy and blue for increased potency/efficacy when compared to wild-type values for each ligand. ND - not determined.

| BW   | D5-Dopamine |                         |              |       |                   |                    | D5R-Rotigotine          |              |       |                   |                    |
|------|-------------|-------------------------|--------------|-------|-------------------|--------------------|-------------------------|--------------|-------|-------------------|--------------------|
|      |             | Emax (Basal)            | FOB          | ΔFOB  | pEC <sub>50</sub> | ΔpEC <sub>50</sub> | Emax (Basal)            | FOB          | ΔFOB  | pEC <sub>50</sub> | ΔpEC <sub>50</sub> |
|      | WT          | 18.2 ± 2.9 (1.8 ± 0.5)  | 13.2 ± 4.9   | 0     | 9.82 ± 0.08       | 0                  | 17.5 ± 1.2 (1.7 ± 0.3)  | 11.8 ± 2.3   | 0     | 9.25 ± 0.12       | 0.00               |
| 2.61 | K98A        | 29.5 ± 8.3 (1.3 ± 0.5)  | 24.9 ± 2.4   | 11.7  | 9.51 ± 0.02       | -0.31              | 31.9 ± 0.1 (1.5 ± 0.1)  | 24.0 ± 2.6   | 10.8  | 9.29 ± 0.12       | 0.04               |
| 3.28 | W116A       | 37.9 ± 8.9 (0.3 ± 0.1)  | 142.1 ± 5.9  | 128.9 | 7.02 ± 0.01       | -2.8               | 24.0 ± 2.9 (0.3 ± 0.1)  | 97.3 ± 7.3   | 84.1  | 6.13 ± 0.11       | -3.12              |
| 3.32 | D120A       | 16.9 ± 5.2 (13.2 ± 4)   | 1.3 ± 0.1    | -11.9 | 7.10 ± 1.19       | -2.72              | N.D.                    | N.D.         | N.D.  | N.D.              | N.D.               |
| 3.33 | I121A       | 30.2 ± 7.2 (0.2 ± 0.1)  | 131.9 ± 10.3 | 118.7 | 5.47 ± 0.13       | -4.35              | 27.7 ± 4.1 (0.2 ± 0.1)  | 119.4 ± 13.0 | 106.2 | 5.48 ± 0.10       | -3.77              |
| 3.36 | S124A       | 36 ± 11.6 (0.7 ± 0.3)   | 61.2 ± 9.1   | 48    | 7.46 ± 0.14       | -2.36              | 38.5 ± 9.2 (0.8 ± 0.3)  | 58.5 ± 7.1   | 45.3  | 7.39 ± 0.13       | -1.86              |
| 3.37 | T125A       | 18.8 ± 7.2 (1.2 ± 0.5)  | 15.8 ± 0.2   | 2.6   | 6.35 ± 0.10       | -3.47              | 25.6 ± 5.1 (1.1 ± 0.3)  | 23.8 ± 1.7   | 10.6  | 8.43 ± 0.10       | -0.82              |
| 3.40 | I128A       | 18.6 ± 4.0 (0.1 ± 0.1)  | 124.6 ± 2.6  | 111.4 | 6.44 ± 0.10       | -3.38              | 2.0 ± 0.5 (0.1 ± 0.1)   | 13.8 ± 2.0   | 0.6   | 6.75 ± 0.22       | -2.50              |
| ECL2 | S219A       | 18.9 ± 5.0 (1.3 ± 0.3)  | 19.1 ± 8.0   | 5.9   | 9.87 ± 0.11       | 0.05               | 21.4 ± 3.4 (1.8 ± 0.4)  | 14.1 ± 4.6   | 0.9   | 9.49 ± 0.09       | 0.24               |
| ECL2 | L221A       | N.D.                    | N.D.         | N.D.  | N.D.              | N.D.               | N.D.                    | N.D.         | N.D.  | N.D.              | N.D.               |
| 5.42 | S229A       | 22.4 ± 4.6 (2.0 ± 0.5)  | 15.3 ± 6.4   | 2.1   | 7.49 ± 0.11       | -2.33              | 23.0 ± 4.0 (1.7 ± 0.6)  | 21.0 ± 6.4   | 7.8   | 6.37 ± 0.43       | -2.88              |
| 5.43 | S230A       | 35 ± 12.6 (0.2 ± 0.1)   | 178.6 ± 77.3 | 165.4 | 7.48 ± 0.14       | -2.34              | 39.4 ± 9.2 (0.4 ± 0.1)  | 95.4 ± 12.5  | 82.2  | 7.37 ± 0.10       | -1.88              |
| 5.46 | S233A       | 33.5 ± 9.4 (2.4 ± 0.6)  | 18.8 ± 8.3   | 5.6   | 6.27 ± 0.14       | -3.55              | 24.7 ± 5.2 (1.9 ± 0.6)  | 20.4 ± 6.9   | 7.2   | 9.84 ± 0.19       | 0.59               |
| 6.48 | W309A       | 31.4 ± 10.1 (0.1 ± 0.1) | 273.5 ± 27.0 | 260.3 | 5.73 ± 0.06       | -4.09              | 7.0 ± 1.8 (0.1 ± 0.1)   | 55.1 ± 6.4   | 41.9  | 7.10 ± 0.11       | -2.15              |
| 6.51 | F312A       | 27.4 ± 7.4 (0.2 ± 0.1)  | 128.9 ± 13.9 | 115.7 | 6.16 ± 0.21       | -3.66              | 29.6 ± 5.9 (0.2 ± 0.1)  | 164.7 ± 28.2 | 151.5 | 6.66 ± 0.15       | -2.59              |
| 6.52 | F313A       | 37.7 ± 16.6 (0.2 ± 0.1) | 150.3 ± 22.4 | 137.1 | 6.64 ± 0.40       | -3.18              | 42.0 ± 11.4 (0.2 ± 0.1) | 161.2 ± 19.9 | 148.0 | 6.76 ± 0.21       | -2.49              |
| 6.55 | N316A       | 30.6 ± 15.2 (0.2 ± 0.1) | 135.3 ± 21.0 | 122.1 | 6.72 ± 0.06       | -3.1               | 34.1 ± 12.0 (0.1 ± 0.1) | 247.6 ± 75.5 | 234.4 | 6.92 ± 0.06       | -2.33              |
| 7.35 | F341A       | 30.7 ± 9.5 (0.4 ± 0.1)  | 76.1 ± 0.4   | 62.9  | 7.96 ± 0.04       | -1.86              | 34.1 ± 5.3 (0.4 ± 0.1)  | 86.9 ± 3.9   | 73.7  | 7.62 ± 0.08       | -1.63              |
| 7.36 | D342A       | 24.7 ± 8.2 (3.1 ± 0.3)  | 7.4 ± 1.8    | -5.8  | 9.58 ± 0.18       | -0.24              | 27.5 ± 7.3 (2.8 ± 0.5)  | 9.7 ± 2.3    | -3.5  | 9.26 ± 0.25       | 0.01               |
| 7.39 | V345A       | 20.4 ± 4.4 (3.8 ± 1.0)  | 5.5 ± 0.3    | -7.7  | 9.78 ± 0.04       | -0.04              | 20.4 ± 3.4 (3.8 ± 0.9)  | 5.6 ± 0.3    | -7.6  | 9.91 ± 0.11       | 0.66               |
| 7.43 | W349A       | 11.6 ± 3.3 (0.1 ± 0.1)  | 75.5 ± 13.9  | 62.3  | 6.92 ± 0.06       | -2.9               | 1.6 ± 0.3 (0.2 ± 0.1)   | 9.2 ± 0.9    | -4.0  | 6.17 ± 0.34       | -3.08              |
