# Supplementary material
Source: PubMed Central journal article supplement (PMC10397222)
Supplement: 41422_2023_808_MOESM15_ESM.pdf [file 41422_2023_808_MOESM15_ESM.pdf]

**Table S7. GPCRome and Radioligand Binding Assay Results**

Select results of GPCRome screening and competition binding experiments of the selected receptors. Fold of Basal (FOB) and pKi values were extracted from a minimum of 3 independent assays in at least triplicate. Fold of Basal (FOB) and pKi displayed values are mean  $\pm$  SEM. N.D. - not determined.

| DNA    | FOB $\pm$ SEM  | pKi $\pm$ SEM   | Ki (nM) |
|--------|----------------|-----------------|---------|
| ADORA1 | 3.7 $\pm$ 0.4  | N.D.            | N.D.    |
| ADRA1A | 2.4 $\pm$ 0.2  | 6.23 $\pm$ 0.09 | 584     |
| ADRA1D | 0.7 $\pm$ 0.2  | 6.12 $\pm$ 0.22 | 759     |
| ADRA2A | 23.9 $\pm$ 3   | 6.20 $\pm$ 0.21 | 631     |
| ADRA2B | 65 $\pm$ 5.6   | 6.54 $\pm$ 0.14 | 291     |
| ADRA2C | 41.5 $\pm$ 1.8 | 6.93 $\pm$ 0.19 | 118     |
| ADRB1  | 1.5 $\pm$ 0.2  | N.D.            | N.D.    |
| ADRB2  | 1.3 $\pm$ 0.2  | N.D.            | N.D.    |
| ADRB3  | 0.6 $\pm$ 0.1  | N.D.            | N.D.    |
| CHRM1  | 1.1 $\pm$ 0.2  | N.D.            | N.D.    |
| CHRM2  | 0.7 $\pm$ 0.1  | 5.62 $\pm$ 0.21 | 2417    |
| CHRM3  | 1.9 $\pm$ 0.2  | N.D.            | N.D.    |
| CHRM4  | 0.5 $\pm$ 0.1  | N.D.            | N.D.    |
| CHRM5  | 1.2 $\pm$ 0.1  | N.D.            | N.D.    |
| CXCR6  | 2.6 $\pm$ 0.8  | N.D.            | N.D.    |
| CXCR7  | 9.2 $\pm$ 1.7  | N.D.            | N.D.    |
| DRD1   | 9.2 $\pm$ 1.4  | 6.41 $\pm$ 0.18 | 387     |
| DRD2   | 77.9 $\pm$ 0.5 | 7.00 $\pm$ 0.09 | 101     |
| DRD3   | 52.2 $\pm$ 5.5 | 8.66 $\pm$ 0.16 | 2       |
| DRD4   | 17.0 $\pm$ 3.5 | 7.20 $\pm$ 0.1  | 63      |
| DRD5   | 6.7 $\pm$ 0.2  | 6.35 $\pm$ 0.19 | 447     |
| GPBA   | 3.5 $\pm$ 0.3  | N.D.            | N.D.    |
| GPR44  | 4.2 $\pm$ 1.1  | N.D.            | N.D.    |
| HRH1   | 1.1 $\pm$ 0.1  | 6.68 $\pm$ 0.22 | 211     |
| HRH2   | 1.1 $\pm$ 0.2  | N.D.            | N.D.    |
| HRH3   | 1.0 $\pm$ 0.1  | N.D.            | N.D.    |
| HTR1A  | 26.9 $\pm$ 0.4 | 7.12 $\pm$ 0.15 | 76      |
| HTR1B  | 2.5 $\pm$ 0.4  | 5.76 $\pm$ 0.17 | 1725    |
| HTR1D  | 3.2 $\pm$ 0.8  | 6.73 $\pm$ 0.16 | 188     |
| HTR1E  | 1.1 $\pm$ 0.1  | N.D.            | N.D.    |
| HTR2A  | 2.6 $\pm$ 0.4  | N.D.            | N.D.    |
| HTR2B  | 3.2 $\pm$ 0.2  | 6.20 $\pm$ 0.14 | 636     |
| HTR4   | 1.3 $\pm$ 0.4  | N.D.            | N.D.    |
| HTR5   | 2.7 $\pm$ 0.1  | 6.12 $\pm$ 0.26 | 759     |
| HTR6   | 1.3 $\pm$ 0.1  | N.D.            | N.D.    |
| HTR7   | 1.4 $\pm$ 0.1  | 6.88 $\pm$ 0.03 | 131     |
| MC4R   | 3.0 $\pm$ 0.2  | N.D.            | N.D.    |
| MTNR1B | 3.2 $\pm$ 0.9  | N.D.            | N.D.    |
| OPRK1  | 2.1 $\pm$ 0.2  | 6.11 $\pm$ 0.24 | 770     |
| OPRM1  | 1.2 $\pm$ 0.2  | 5.52 $\pm$ 0.02 | 2997    |
| SSTR1  | 10.0 $\pm$ 1.6 | N.D.            | N.D.    |
| SSTR4  | 56.8 $\pm$ 6.4 | N.D.            | N.D.    |
