# Supplementary material
Source: PubMed Central journal article supplement (PMC10397222)
Supplement: 41422_2023_808_MOESM16_ESM.pdf [file 41422_2023_808_MOESM16_ESM.pdf]

**Table S8. The distance of W<sup>6.48</sup> (Toggle switch) to I<sup>3.40</sup> (PIF motif) in structures of dopamine receptors.**

| Receptor | Ligand          |                 | Signal protein | Method  | PDB  | Res. | State    | Degree active (%) | W6.48-I3.40 distance | Reference                    |
|----------|-----------------|-----------------|----------------|---------|------|------|----------|-------------------|----------------------|------------------------------|
|          | Name            | Function        |                |         |      |      |          |                   |                      |                              |
| DRD1     | rotigotine      | Agonist         | Gs             | cryo-EM | 8IRR | 3.2  | Active   | -                 | 3.9                  | This paper                   |
| DRD2     | rotigotine      | Agonist         | Gi/o           | cryo-EM | 8IRS | 3.0  | Active   | -                 | 4.0                  | This paper                   |
| DRD3     | rotigotine      | Agonist         | Gi/o           | cryo-EM | 8IRT | 2.7  | Active   | -                 | 4.0                  | This paper                   |
| DRD4     | rotigotine      | Agonist         | Gi/o           | cryo-EM | 8IRU | 3.2  | Active   | -                 | 4.0                  | This paper                   |
| DRD5     | rotigotine      | Agonist         | Gs             | cryo-EM | 8IRW | 3.1  | Active   | -                 | 4.0                  | This paper                   |
| DRD1     | Cpd1            | Agonist         | Gs             | X-ray   | 7JOZ | 3.8  | Active   | 100               | 4.2                  | 10.1038/s41467-021-23519-9   |
| DRD1     | PW0464          | Agonist         | Gs             | cryo-EM | 7CKY | 3.2  | Active   | 100               | 3.6                  | 10.1016/J.CELL.2021.01.028   |
| DRD1     | dopamine        | Agonist         | Gs             | cryo-EM | 7LJD | 3.2  | Active   | 100               | 4.1                  | 10.1101/2021.02.07.430101    |
| DRD1     | SKF-82526       | Agonist         | Gs             | cryo-EM | 7CKW | 3.2  | Active   | 100               | 3.5                  | 10.1016/J.CELL.2021.01.028   |
| DRD1     | CHEMBL1416789   | Agonist         | Gs             | cryo-EM | 7CRH | 3.3  | Active   | 100               | 3.7                  | 10.1016/J.CELL.2021.01.028   |
| DRD1     | dopamine        | Agonist         | Gs             | cryo-EM | 7CKZ | 3.1  | Active   | 100               | 3.5                  | 10.1016/J.CELL.2021.01.028   |
| DRD1     | AA77636         | Agonist         | Gs             | cryo-EM | 7CKX | 3.5  | Active   | 100               | 3.6                  | 10.1016/J.CELL.2021.01.028   |
| DRD1     | SKF-81297       | Agonist         | Gs             | cryo-EM | 7LJC | 3.0  | Active   | 100               | 3.8                  | 10.1101/2021.02.07.430101    |
| DRD1     | 39YC3L0ZU       | Agonist         | Gs             | cryo-EM | 7JVP | 2.9  | Active   | 100               | 3.9                  | 10.1016/J.CELL.2021.01.027   |
| DRD1     | apomorphine     | Agonist         | Gs             | cryo-EM | 7JVQ | 3.0  | Active   | 100               | 4.2                  | 10.1016/J.CELL.2021.01.027   |
| DRD1     | SKF-81297       | Agonist         | Gs             | cryo-EM | 7JV5 | 3.0  | Active   | 100               | 3.5                  | 10.1016/J.CELL.2021.01.027   |
| DRD2     | bromocriptine   | Agonist         | Gi/o           | cryo-EM | 7JVR | 2.8  | Active   | 100               | 4.0                  | 10.1016/J.CELL.2021.01.027   |
| DRD2     | bromocriptine   | Agonist         | Gi/o           | cryo-EM | 6VMS | 3.8  | Active   | 100               | 4.6                  | 10.1038/S41586-020-2379-5    |
| DRD3     | PD128907        | Agonist         | Gi/o           | cryo-EM | 7CMV | 2.7  | Active   | 100               | 4.1                  | 10.1016/J.MOLCEL.2021.01.003 |
| DRD3     | pramipexole     | Agonist         | Gi/o           | cryo-EM | 7CMU | 3.0  | Active   | 100               | 3.8                  | 10.1016/J.MOLCEL.2021.01.003 |
| DRD2     | piperone        | Antagonist      | -              | X-ray   | 7DFP | 3.1  | Inactive | 1                 | 8.4                  | 10.1038/S41467-020-20221-0   |
| DRD2     | haloperidol     | Antagonist      | -              | X-ray   | 6LUQ | 3.1  | Inactive | 1                 | 8.3                  | 10.1038/S41467-020-14884-Y   |
| DRD2     | risperidone     | Inverse agonist | -              | X-ray   | 6CM4 | 2.9  | Inactive | 1                 | 8.6                  | 10.1038/NATURE25758          |
| DRD3     | eticlopride     | Antagonist      | -              | X-ray   | 3PBL | 2.9  | Inactive | 1                 | 8.0                  | 10.1126/SCIENCE.1197410      |
| DRD4     | L745870         | Antagonist      | -              | X-ray   | 6IQL | 3.5  | Inactive | 83                | 4.9                  | 10.7554/ELIFE.48822          |
| DRD4     | [3H]NEMONAPRIDE | Antagonist      | -              | X-ray   | 5WIU | 2.0  | Inactive | 1                 | 6.0                  | 10.1126/SCIENCE.AAN5468      |
| DRD4     | [3H]NEMONAPRIDE | Antagonist      | -              | X-ray   | 5WIV | 2.1  | Inactive | 1                 | 6.1                  | 10.1126/SCIENCE.AAN5468      |
